# Supplementary material
Source: Springer Nature journal article supplement (https://www.springermedizin.de/resource/supplementary/12936_2011_1772_MOESM1_ESM.pdf/9541700)

# Punta Europa

Biabia  
Cacahual Mongola

Sacriba

Punta Europa

Malabo

Luba

Riaba

Ureca

10 mi

10 km

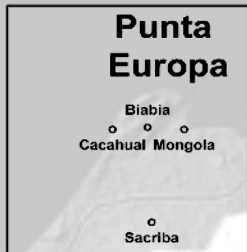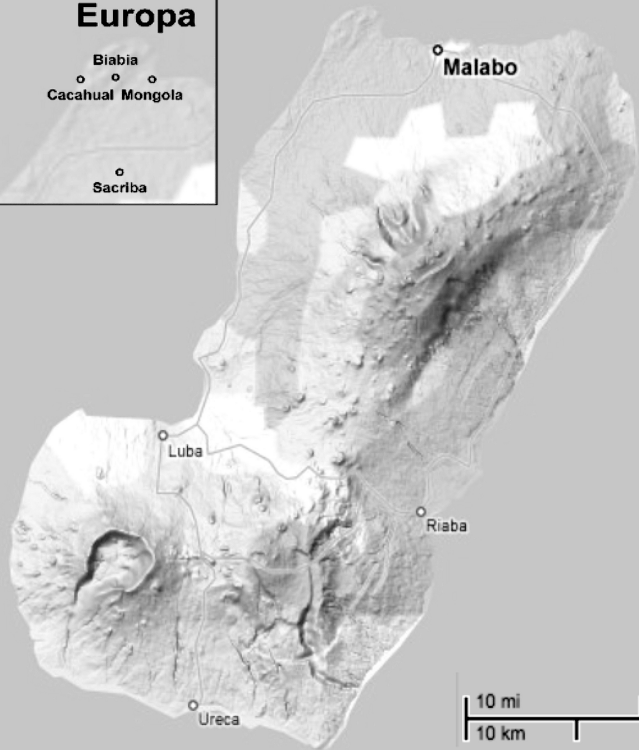

Supplement: MOESM1 [file 9541700]
